# Supplementary material for: Highly efficient CO2 capture by carbonyl-containing ionic liquids through Lewis acid–base and cooperative C–H⋯O hydrogen bonding interaction strengthened by the anion
Source: Royal Society of Chemistry journal article supplement (doi:10.1039/c4cc06944g), 2014-01-01
Supplement: c4cc06944g1.pdf [file c4cc06944g1.pdf]

## Electronic Supplementary Information

### **Highly efficient CO<sub>2</sub> capture by carbonyl-containing ionic liquids through lewis acid-base and cooperative C-H ···O hydrogen bonding interaction strengthened by the anion**

Fang Ding,<sup>1</sup> Xi He,<sup>1</sup> Xiaoyan Luo,<sup>1</sup> Wenjun Lin,<sup>1</sup> Kiahong Chen,<sup>1</sup> Haoran Li,<sup>1,2</sup> and  
Congmin Wang<sup>1</sup>

<sup>1</sup>Department of Chemistry, ZJU-NHU United R&D Center, Zhejiang University, Hangzhou 310027, P. R. China

<sup>2</sup>State Key Laboratory of Chemical Engineering, Department of Chemical and Biological Engineering, Zhejiang University, Hangzhou 310027, P. R. China

Email: [chewcm@zju.edu.cn](mailto:chewcm@zju.edu.cn)

## Experimental Section

### Materials and general methods

<sup>1</sup>H-Imidazole-4-carbaldehyde (4-CHO-Im), 4-Hydroxyacetophenone (4-Kt-PhOH), 4-Hydroxybenzaldehyde (4-CHO-PhOH), and 4-Hydroxy-ethylbenzoate (4-EF-PhOH) were purchased from Sigma-Aldrich. Lithium bis (trifluoromethane sulfonyl)imide (LiTf<sub>2</sub>N) was obtained from 3M company. N-methyl imidazole and Trihexyl(tetradecyl) phosphonium bromide ([P<sub>66614</sub>][Br]) were bought from Nanjing Chemlin company. An anion-exchange resin -711(Cl) was obtained from Shanghai Huazhen Sci. & Tech. Co., Ltd. All chemicals were obtained in the highest purity grade possible, and were used as received unless otherwise stated. All ionic liquids (ILs) samples were dried under vacuum at 60 °C for 24 h to reduce possible trace of water. <sup>1</sup>H NMR and <sup>13</sup>C NMR spectra were recorded on a Bruker spectrometer (600MHz) in CDCl<sub>3</sub> or DMSO with tetramethylsilane as the standard. FT-IR spectra were obtained using a Bio-Rad Excalibur FTS-3000 spectrometer.

### Preparation of carbonyl-containing anion-functionalized ILs

These carbonyl-containing anion-functionalized ILs were prepared by the neutralizing between substituted phenols or substituted imidazole and a solution of phosphonium hydroxide ([P<sub>66614</sub>][OH]) in ethanol, which was obtained by the anion-exchange method from [P<sub>66614</sub>][Br].<sup>[1-3]</sup> In a typical synthesis of carbonyl-based IL [P<sub>66614</sub>][4-CHO-Im], equimolar 4-CHO-PhOH was added to the [P<sub>66614</sub>][OH] solution in ethanol. The mixture was then stirred at 30°C for 12 h. Subsequently, ethanol and water were distilled off at 60 °C under reduced pressure. The obtained IL [P<sub>66614</sub>][4-CHO-Im] was dried in high vacuum for 12 h at 60°C to remove possible trace of water. The structures of these carbonyl-based anion-functionalized ILs were confirmed by NMR and IR. No impurities were found by NMR spectroscopy. The water content of these ILs was determined with a Karl Fisher titration and found to be less than 0.1 wt%.

### Absorption and desorption of CO<sub>2</sub>

In a typical absorption of CO<sub>2</sub>, CO<sub>2</sub> of atmospheric pressure was bubbled through about 1.0 g IL in a glass container with an inner diameter of 10 mm, and the flow rate was about 60 ml min<sup>-1</sup>. The glass container was partly immersed in a metal heating jacket of desirable temperature. The amount of CO<sub>2</sub> absorbed was determined at regular intervals by the electronic balance with an accuracy of ±0.1 mg. During the absorption

of CO<sub>2</sub> under reduced pressure, CO<sub>2</sub> was diluted with N<sub>2</sub> to reduce the partial pressure of CO<sub>2</sub> passing through the system. The CO<sub>2</sub> partial pressure was controlled by changing the flow rate ratio of CO<sub>2</sub> and N<sub>2</sub>.

In a typical desorption of CO<sub>2</sub>, N<sub>2</sub> of atmospheric pressure was bubbled through about 1.0 g ILs containing captured CO<sub>2</sub> in a glass container, which was partly immersed in a metal heating jacket of desirable temperature, and the flow rate was about 60 ml min<sup>-1</sup>. The release of CO<sub>2</sub> was determined at regular intervals by the electronic balance with an accuracy of ±0.1 mg.

### Computational Section

All calculations were performed using the GAUSSIAN03 programs package. For each set of calculations, we calculated geometry optimization for each free anion, the free CO<sub>2</sub> molecule, the anion-CO<sub>2</sub> complex, and the anion-2CO<sub>2</sub> complex at the B3LYP/6-31G++(d,p) level.

### 1.NMR and IR data of carbonyl-containing anion-functionalized ILs

**[P<sub>66614</sub>][Im-4-CHO]:** <sup>1</sup>H NMR (CDCl<sub>3</sub>): 0.86 (m, 12H, CH<sub>3</sub>), 1.22-1.43 (m, 48H, CH<sub>2</sub>), 2.20 (m, 8H, PCH<sub>2</sub>), 7.65 (s, 1H, Im C5), 7.83 (s, 1H, Im C2), 9.68 (s, 1H, CHO); <sup>13</sup>C NMR (CDCl<sub>3</sub>): 13.9, 14.1, 18.8, 19.1, 21.7, 22.3, 22.6, 28.9, 29.2, 29.3, 29.5, 29.6, 30.3, 30.4, 30.9, 31.8, 137.0, 141.8, 146.5, 183.2 ppm. IR: 2954, 2924, 2854, 2732, 2678, 1640, 1575, 1490, 1462, 1377, 1349, 1240, 1174, 1111, 984, 782, 762, 720, 655 cm<sup>-1</sup>.

**[P<sub>66614</sub>][4-EF-PhO]:** <sup>1</sup>H NMR (DMSO): 0.87 (m,12H,CH<sub>3</sub>), 1.30-1.34 (t,3H,CH<sub>3</sub>), 1.24-1.42 (m, 48H, CH<sub>2</sub>), 2.18 (m, 8H, PCH<sub>2</sub>), 4.22-4.28 (q, 2H, CH<sub>2</sub>), 6.69-6.72 (d, 2H, Ph C3,5), 7.77-7.79 (d, 2H, Ph C2,6); <sup>13</sup>C NMR (DMSO): 13.8, 17.2, 17.7, 20.6, 21.8, 22.1, 28.1, 28.7, 29.0, 29.1, 29.7, 29.8, 30.4, 31.3, 57.9, 106.2, 118.6, 131.4, 166.5, 177.0 ppm. IR: 2954, 2924, 2854, 1670, 1580, 1511, 1462, 1366, 1302, 1266, 1147, 1103, 1086, 985, 847, 776, 713, 619 cm<sup>-1</sup>.

**[P<sub>66614</sub>][4-CHO-PhO]:** <sup>1</sup>H NMR (CDCl<sub>3</sub>): 0.89 (m,12H,CH<sub>3</sub>), 1.26-1.44 (m,48H, CH<sub>2</sub>), 2.18(m, 8H, PCH<sub>2</sub>), 6.51-6.54 (d, 2H, Ph C3,5), 7.51-7.53 (d, 2H, Ph C2,6), 9.46 (s,1H,CHO); <sup>13</sup>C NMR (CDCl<sub>3</sub>): 13.8, 14.0, 18.5, 19.0, 21.6, 22.2, 22.6, 28.8, 29.2,

29.3, 29.4, 29.5, 29.6, 30.2, 30.4, 30.9, 31.8, 119.6, 121.0, 133.1, 177.3, 188.3 ppm. IR: 2954, 2924, 2854, 1670, 1580, 1511, 1462, 1366, 1302, 1266, 1147, 1103, 1086, 985, 847, 776, 713, 619 cm<sup>-1</sup>.

**[P<sub>66614</sub>][4-Kt-PhO]:** <sup>1</sup>H NMR (CDCl<sub>3</sub>): 0.89 (m, 12H, CH<sub>3</sub>), 1.26-1.43 (m, 48H, CH<sub>2</sub>), 2.18 (m, 8H, PCH<sub>2</sub>), 2.40 (s, 3H, COCH<sub>3</sub>), 6.51-6.53 (d, 2H, Ph C3,5), 7.69-7.71 (d, 2H, Ph C2,6); <sup>13</sup>C NMR (CDCl<sub>3</sub>): 13.8, 14.0, 18.5, 19.0, 21.6, 21.7, 22.2, 22.6, 25.6, 28.8, 29.2, 29.3, 29.4, 29.6, 30.2, 30.4, 30.6, 30.7, 31.0, 31.8, 118.4, 130.5, 131.5, 174.8, 195.1 ppm. IR: 2954, 2924, 2854, 1634, 1568, 1513, 1462, 1438, 1360, 1281, 1155, 1104, 1065, 983, 948, 846, 719, 698 cm<sup>-1</sup>.

**[Im-EA][Tf<sub>2</sub>N]:** <sup>1</sup>H NMR (DMSO): 1.25-1.29 (t, 3H, CH<sub>3</sub>), 3.94 (s, 3H, NCH<sub>3</sub>), 4.21-4.26 (q, 2H, OCH<sub>2</sub>), 5.25 (s, 2H, COCH<sub>2</sub>), 7.73-7.74 (d, 2H, -CH=CH-), 9.09 (s, 1H, C2); <sup>13</sup>C NMR (DMSO): 13.8, 35.9, 49.5, 61.8, 123.3, 137.7, 166.8 ppm. IR: 3163, 1751, 1574, 1347, 1176, 1135, 1053, 975, 845, 790, 741, 710, 653 cm<sup>-1</sup>.

**Table S1.** The comparison of CO<sub>2</sub> absorption by typical carbonyl-containing ILs with that by other functionalized ILs.

| Ionic liquid <sup>a</sup>       | Temperature ( °C) | CO <sub>2</sub> absorption <sup>b</sup> | Reference              |
|---------------------------------|-------------------|-----------------------------------------|------------------------|
| [P <sub>66614</sub> ][4-CHO-Im] | 30                | 1.24                                    | This work              |
| [P <sub>66614</sub> ][Triz]     | 23                | 0.97                                    | Wang <sup>4</sup>      |
| [P <sub>66614</sub> ][Pro]      | 25                | 0.91                                    | Brennecke <sup>5</sup> |
| [P <sub>66614</sub> ][2-CNpyr]  | 25                | 0.90                                    | Brennecke <sup>6</sup> |
| [MTBDH][Im]                     | 30                | 1.03                                    | Wang <sup>7</sup>      |
| [APBim][BF <sub>4</sub> ]       | 25                | ~0.5                                    | Davis <sup>8</sup>     |
| [AP <sub>4443</sub> ][Gly]      | 45                | ~1.1 <sup>c</sup>                       | Zhang <sup>9</sup>     |
| [Choline][Pro]                  | 50                | ~0.5                                    | Han <sup>10</sup>      |

<sup>a</sup>[P<sub>66614</sub>][Triz], trihexyl (tetradecyl)phosphonium trizolate; [P<sub>66614</sub>][Pro], trihexyl (tetradecyl)phosphonium proline; [P<sub>66614</sub>][2-CNpyr], trihexyl(tetradecyl) phosphonium 2-cyanopyrrolide; [P<sub>4444</sub>][Ala], tetrabutylphosphonium alanine; [APBim][BF<sub>4</sub>], 1-(3-aminopropyl)-3-butylimidazolium tetrafluoroborate;

[AP<sub>4443</sub>][Gly], 3-(aminopropyl)tributylphosphonium glycinate; [Choline][Pro], 2-(hydroxyethyl)trimethylammonium proline; <sup>b</sup>Mole CO<sub>2</sub> per mole IL. <sup>c</sup>ILs on porous SiO<sub>2</sub>.

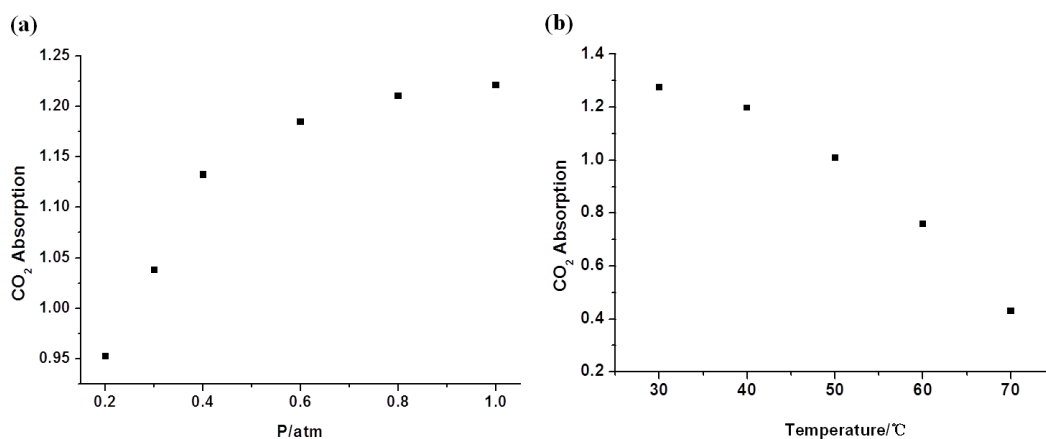

**Figure S1.** The effect of (a) pressure and (b) temperature on CO<sub>2</sub> absorption by [P<sub>66614</sub>][Im-4-CHO].

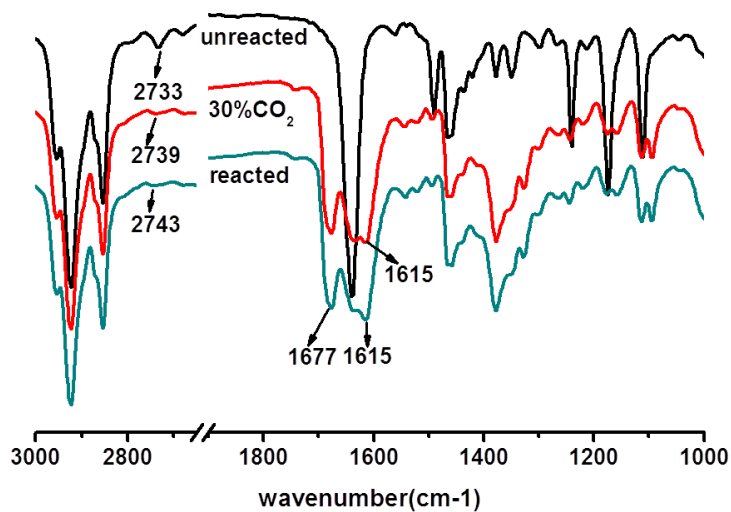

**Figure S2.** The IR spectra of before and after the capture of CO<sub>2</sub> capture under reduced pressure (30% CO<sub>2</sub>) and atmospheric pressure (100% CO<sub>2</sub>) by [P<sub>66614</sub>][4-CHO-Im].

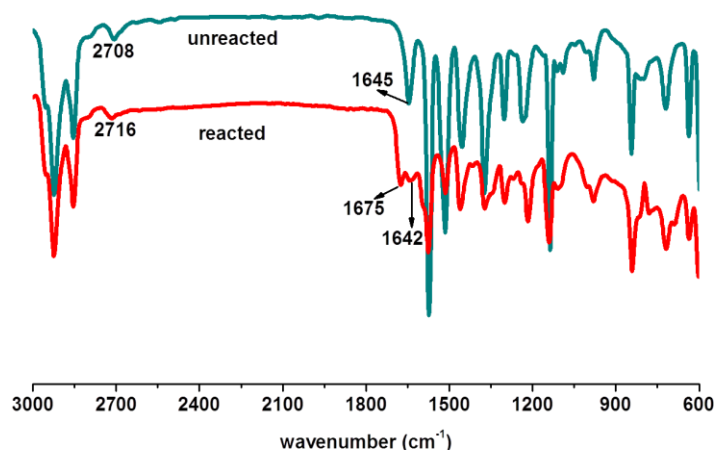

**Figure S3.** The IR spectra before and after the capture of CO<sub>2</sub> by [P<sub>66614</sub>][4-CHO-PhO].

## References

1. Fukumoto, K.; Yoshizawa, M.; Ohno, H. *J. Am. Chem. Soc.* 2005, *127*, 2398.
2. Wang, C. M.; Cui, G. K.; Luo, X. Y.; Xu, Y. J.; Li, H. R.; Dai, S. *J. Am. Chem. Soc.* 2011, *133*, 11916.
3. Wang, C. M.; Luo, H. M.; Li, H. R.; Zhu, X.; Yu, B.; Dai, S. *Chem.-Eur. J.* 2012, *18*, 2153.
4. Wang, C. M.; Luo, X. Y.; Luo, H. M.; Jiang, D.; Li, H. R.; Dai, S. *Angew. Chem., Int. Ed.* **2011**, *50*, 4918.
5. Gurkan, B. E.; de la Fuente, J. C.; Mindrup, E. M.; Ficke, L. E.; Goodrich, B. F.; Price, E. A.; Schneider, W. F.; Brennecke, J. F. *J. Am. Chem. Soc.* **2010**, *132*, 2116.
6. Gurkan, B.; Goodrich, B. F.; Mindrup, E. M.; Ficke, L. E.; Massel, M.; Seo, S.; Senftle, T. P.; Wu, H.; Glaser, M. F.; Shah, J. K.; Maginn, E. J.; Brennecke, J. F.; Schneider, W. F. *J. Phys. Chem. Lett.* **2010**, *1* (24), 3494.
7. Wang, C. M.; Luo, H. M.; Jiang, D. E.; Li, H. R.; Dai, S. *Angew. Chem., Int. Ed.* **2010**, *49*, 5978.
8. Bates, E. D.; Mayton, R. D.; Ntai, I.; Davis, J. H. *J. Am. Chem. Soc.* **2002**, *124*, 926.
9. Zhang, J. M.; Zhang, S. J.; Dong, K.; Zhang, Y. Q.; Shen, Y. Q.; Lv, X. M. *Chem. Eur. J.* **2006**, *12*, 4021.

10. Li, X. Y.; Hou, M. Q.; Zhang, Z. F.; Han, B. X.; Yang, G. Y.; Wang, X. L.; Zou, L. Z. *Green Chem.* **2008**, *10*, 879.
